# Supplementary material for: Bridging the Gaps Between Us: Explaining When and Why People of Color Express Shared Political Views
Source: Springer Nature journal article supplement (doi:10.1007/s11109-022-09797-z), 2022-05-17
Supplement: MOESM1 [file 20423594]

**Supplementary Information (SI)**

1) SI.1. Question Wording for Studies 1-3 and Balance Checks for Studies 2-3

2) SI.2. Association between Outcomes and Solidarity with PoC Does Not Vary Significantly between Asian American and Latino Adults (Study 1)

3) SI.3. Mediation Results are Robust to Inclusion of Participants Who Failed Manipulation Check

4) SI.4. Re-Analysis of Mediation Results with Single Measures of Mediator and Outcomes

5) SI.5. Sensitivity Analyses of Downstream Path in Mediation Analyses for Latino and Asian American samples.

**SI.1. Question Wording for Studies 1-3 and Balance Checks for Studies 2-3**

*Question Wording for Variables Used in Study 1 (Asian and Latino Adults)*

-What year were you born in?

-Were you born in the United States?

1. Yes
2. No

-In general, do you think of yourself as….

1. Extremely conservative
2. Conservative
3. Slightly conservative
4. Moderate
5. Slightly liberal
6. Liberal
7. Extremely liberal

-What is your gender, female or male?

1) Female

2) Male

-What is the highest level of education you have completed?

1. Less than high school
2. High school
3. Some college
4. Bachelor’s degree or higher

-I feel solidarity with people of color.

1) Strongly disagree

…

7) Strongly agree

-People of color have a lot in common with each other.

1) Strongly disagree

…

7) Strongly agree

*Question Wording for Studies 2 (Latino adults) and 3 (Asian American adults)*

-What racial or ethnic group best describes you?

Asian or Asian American (1)

Black or African American (2)

Hispanic or Latino (3)

Middle Eastern (4)

Native American (5)

White (6)

Another racial or ethnic group (7)

[IF LATINO, ASK NEXT ITEM]

-Hispanics and Latinos have their roots in many different countries. To what country do you or your family trace your ancestry?  If your family has roots in several countries, please pick the one country that, in your own opinion, best reflects your ancestry.

Argentina (1)

Bolivia (4)

Brazil (5)

Chile (6)

Colombia (7)

Costa Rica (8)

Cuba (9)

The Dominican Republic (10)

Ecuador (11)

El Salvador (12)

Guatemala (13)

Honduras (14)

Mexico (15)

Nicaragua (16)

Panama (17)

Paraguay (18)

Peru (19)

Puerto Rico (20)

Uruguay (21)

Spain (22)

Other (23)

[IF ASIAN, ASK LIST BELOW]

-Asian Americans have their roots in many different countries. To what country do you or your family trace your ancestry?  If your family has roots in several countries, please pick the one country that, in your own opinion, best reflects your ancestry.

1 China

2 India

3 South Asia

4 Philippines

5 Vietnam

6 North Vietnam

7 South Vietnam

8 Korea

9 Japan

10 South East Asia

11 Bangladesh

12 Bhutan

13 Burma/Myanmar

14 Cambodia/Kampuchea

15 Indochina

16 Indonesia

17 Iwo Jima

18 Laos

19 Malaysia

20 Maldives

21 Nepal

22 Okinawa

23 Pakistan

24 Singapore

25 Sri Lanka

26 Taiwan

27 Thailand

28 Another country [text box]

Thank you so very much for participating in our study. We hope that you will pay close attention to the questions on our survey. The thoughtful responses you provide to our questions are essential to advancing our scientific research, and all respondents can help us reach our goal. We would not be able to conduct our research without your thoughtful and careful answers to our questions. We know you are busy and greatly appreciate your time.

-Using the response options provided, please select "Oppose (2)" to let us know that you are paying attention.

Strongly oppose (1)

Oppose (2)

Somewhat oppose (3)

Neither oppose, nor support (4)

Somewhat support (5)

Support (6)

Strongly support (7)

-The next few questions in this survey will ask you about some basic demographic information about yourself. Please use the response options provided to record your answers.

-In what year were you born?

-What is your gender?

-Were you born in the United States?

-In general, do you think of yourself as….

Extremely conservative (1)

Conservative (2)

Slightly conservative (3)

Moderate (4)

Slightly liberal (5)

Liberal (6)

Extremely liberal (7)

In the next section, you will be reading a brief news report on a pressing topic. Please read it closely. You will be asked some questions about it after you read it.

[Control]

***News Brief: A Tortoise at Risk***

-Associated Press

He’s about 70 to 80 years old, and he’s been alone for the last 30 years. His name is Lonesome George, and scientists believe he is the last of his subspecies, *Geochelone elephantopus abingdoni*, a giant tortoise found only on the Galápagos island of Pinta. As giant tortoises live about 150 to 200 years, George could still be considered relatively young. Found in 1971, George is now living at the Charles Darwin Research Station on Santa Cruz with other giant tortoises in the station’s captive breeding program. Researchers keep George with two female giant tortoises in hopes that he will pass on some of this genes even if this would be a hybrid offspring. So far they’ve had no luck. It is hard to say if he is even interested in trying, said Erica Buck of the Charles Darwin Foundation.


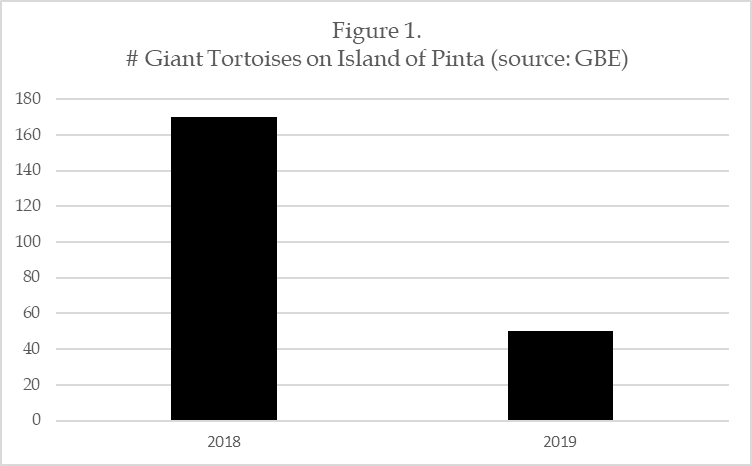


In the 19th century, whalers and sealers hunted giant tortoises for their meat and oil, taking advantage of the fact that they could be kept in the holds of the ship for up to a year without food or water. Females were usually taken first because they were smaller and easier to find in the lowland areas during the egg-laying season. Last winter, an independent group of scientists performed a DNA test on George. The scientists determined that George’s closest relatives are found on islands far from his home island of Pinta, whereas tortoises on closer islands are more distantly related.

[IF ASIAN, ASSIGN TO Latino Treatment]

***News Brief: Never Fully American, Always a Suspected Foreigner: 2021 Continues Highlighting Latinos’ Decades-Long Exclusion in the U.S.***

-Associated Press

For many Latino individuals, the year 2021 began with a roar, as hate crimes and other public expressions of prejudice toward them surged in cities and towns throughout the United States. Many of these incidents were caught on video, providing yet another vivid reminder that, no matter how long a Latino individual has been in the United States or how much they contribute to this nation’s culture and economy, they are still viewed as un-American to various degrees, similar to many Asian people. This increase has been in the making for some time. Figure 1 shows an increase in reported hate crimes against Latino individuals from 2018 to 2019. This spike is likely under-estimated, since too many victims of hate crimes are too afraid to come forward and report an incident.


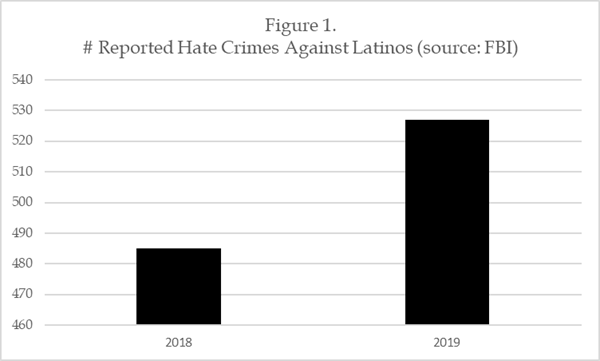


As a recent victim of one of these hate crimes toward Latinos stated (on condition of anonymity): “It’s so scary—and frustrating—that you can give so much of yourself to this country, and yet still be treated like a foreigner, even if you and your family have been here for generations.” These words ring true among many Asian individuals throughout the U.S., including those who recently arrived and those who have been here for decades. One lesson of this latest wave of anti-Latino prejudice is that despite the social, political, and economic diversity of the Latino population in the U.S., too many Americans continue seeing them as “outsiders,” never to be fully included.

[IF LATINO, ASSIGN TO Asian Treatment]

***News Brief: Never Fully American, Always a Suspected Foreigner: 2021 Continues Highlighting Asians’ Decades-Long Exclusion in the U.S.***

-Associated Press

For many Asian individuals, the year 2021 began with a roar, as hate crimes and other public expressions of prejudice toward them surged in cities and towns throughout the United States. Many of these incidents were caught on video, providing yet another vivid reminder that, no matter how long an Asian individual has been in the United States or how much they contribute to this nation’s culture and economy, they are still viewed as un-American to various degrees, similar to many Latino people. This increase has been in the making for some time. Figure 1 shows an increase in reported hate crimes against Asian individuals from 2018 to 2019. This spike is likely under-estimated, since too many victims of hate crimes are too afraid to come forward and report an incident.


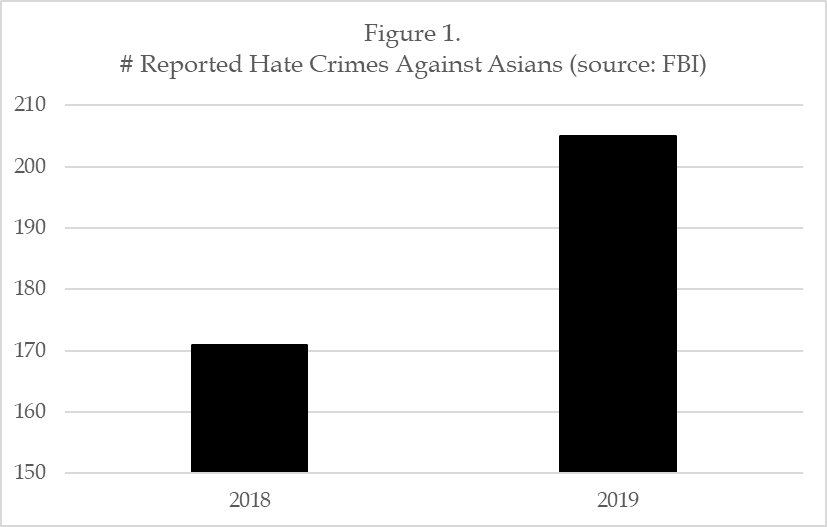


As a recent victim of one of these hate crimes toward Asians stated (on condition of anonymity): “It’s so scary—and frustrating—that you can give so much of yourself to this country, and yet still be treated like a foreigner, even if you and your family have been here for generations.” These words ring true among many Latino individuals throughout the U.S., including those who recently arrived and those who have been here for decades. One lesson of this latest wave of anti-Asian prejudice is that despite the social, political, and economic diversity of the Asian population in the U.S., too many Americans continue seeing them as “outsiders,” never to be fully included.

Before moving on to the next section, please answer the following statement based on the information you just read.

The information I read highlighted how [Latinos or Asian Americans] are still viewed as “not fully American.”

1) True

2) False

In the next part of this survey, you will be asked to report your opinions about various issues. Please use the response options provided to indicate how much you disagree or agree with each statement.

*PoC Solidarity*

-I feel solidarity with people of color, which include African Americans, Asian Americans, and Latinos.

-The problems of Blacks, Latinos, and Asian Americans and other minorities are too different for them to be allies or partners.

1) Strongly disagree

2) Somewhat disagree

3) Neither disagree nor agree

4) Somewhat agree

5) Strongly agree

-You will now be asked to report your opinions about various policy proposals. Please use the response options provided to indicate how much you disagree or agree with each statement.

*Legal immigration*

-Increasing the number of H1-B visas, which allow U.S. companies to hire people from foreign countries to work in highly skilled occupations, such as engineering, computer programming, and high-technology.

-Expanding the number of visas available to legal immigrants wishing to enter the United States.

1) Strongly disagree

2) Somewhat disagree

3) Neither disagree nor agree

4) Somewhat agree

5) Strongly agree

*Undocumented immigration*

-Increase the number of border patrol agents at the U.S.-Mexico border.

-Provide a pathway to citizenship for undocumented immigrants.

1) Strongly disagree

2) Somewhat disagree

3) Neither disagree nor agree

4) Somewhat agree

5) Strongly agree

Thank you for completing this survey. Your opinions are greatly appreciated.

Balance Check: Study 2 (Latino adults)

|  | Control | Treatment | Difference significant? |
| --- | --- | --- | --- |
| Mexicans | 39.6% | 43.5% | *p*<.317, via Χ2 |
| U.S.-born | 69% | 71.1% | *p*<.623, via Χ2 |
| Age (years) | 39.18 | 39.85 | *p*<.548, via t-test |
| Females | 56.3% | 56.8% | *p*<.902, via Χ2 |
| Liberal (level) | 4.08 | 3.99 | *p*<.459, via t-test |

*Note:* Liberal coded 1 to 7. All tests are two-tailed. In an OLS regression predicting assignment to treatment based on these covariates shows these variables are collectively indistinguishable from zero F(5, 608) = .43, Prob > F = .829

Balance Check: Study 3 (Asian American adults)

|  | Control | Treatment | Difference significant? |
| --- | --- | --- | --- |
| Chinese | 18.5% | 18.9% | *p*<.894, via Χ2 |
| U.S.-born | 51.5% | 43.2% | *p*<.035, via Χ2 |
| Age (years) | 41.97 | 43.57 | *p*<.202, via t-test |
| Females | 55.9% | 58.0% | *p*<.577, via Χ2 |
| Liberal (level) | 3.97 | 4.11 | *p*<.242, via t-test |

*Note:* Liberal coded 1 to 7. All tests are two-tailed. In an OLS regression predicting assignment to treatment based on these covariates shows these variables are collectively indistinguishable from zero F(5, 627) = 1.65, Prob > F = .146

**SI.2. Association between Outcomes and Solidarity with PoC Does Not Vary Significantly between Asian American and Latino Adults (Study 1)**

|  | Support  DACA | Support  Visas |
| --- | --- | --- |
| Asian American | -.078^  (.046) | -.077^  (.044) |
| Solidarity w/PoC | .348*  (.038) | .254*  (.039) |
| Asian x Solidarity | .005  (.009) | .010  (.009) |
|  |  |  |
| Liberal ideology | .055*  (.004) | .038*  (.004) |
| U.S.-born | .010  (.011) | -.047*  (.011) |
| Education | .004  (.020) | .027  (.020) |
| Age (years) | .001*  (.000) | -.002*  (.000) |
| Female | .024*  (.011) | .012  (.010) |
| Constant | .214*  (.035) | .467*  (.035) |
| N | 2,400 | 2,400 |

*Note:* Entries are OLS coefficients with standard errors in parentheses. **p*<.05, ^.10, two-tailed.

**SI.3. Mediation Results are Robust to Inclusion of Participants Who Failed Manipulation Check**

Study 2: Latinos

*Note:* Entries are OLS coefficients with standard errors in parentheses. **p*<.05, ^.10, two-tailed.

|  | Solidarity  (mediator) |  | Support flexible  policy  (undocumented) | Support flexible  policy  (high-skill) |
| --- | --- | --- | --- | --- |
| Treatment: Asians as *perpetual foreigners* | .031^  (.018) |  | --- | --- |
| Solidarity with PoC | --- |  | .284*  (.039) | .319*  (.043) |
| Constant | .636*  (.013) |  | .363*  (.027) | .459*  (.030) |
| N | 600 |  | 532 | 540 |

Study 3: Asian Americans

*Note:* Entries are OLS coefficients with standard errors in parentheses. **p*<.05, ^*p*<.10, two-tailed.

|  | Solidarity  (mediator) |  | Support flexible  policy  (undocumented) | Support flexible  policy  (high-skill) |
| --- | --- | --- | --- | --- |
| Treatment: Asians as *perpetual foreigners* | .032*  (.016) |  | --- | --- |
| Solidarity with PoC | --- |  | .347*  (.044) | .226*  (.043) |
| Constant | .616*  (.012) |  | .269*  (.029) | .541*  (.029) |
| N | 600 |  | 532 | 540 |

**SI.4. Re-Analysis of Mediation Results with Single Measures of Mediator and Outcomes**

Latinos

*Note*: OLS coefficients with standard errors in parentheses. **p*<.05, ^*p*<.10, two-tailed.

|  | PoC  Solidarity | PoC Solidarity (reverse) | Support  Pathway | Oppose border patrol (reverse) | Support high-skill immigration | Support visas for legal immigrants |
| --- | --- | --- | --- | --- | --- | --- |
| Asians:  *perpetual*  *foreigners* | .043^  (.025) | .054^  (.029) |  |  |  |  |
| PoC  Solidarity | --- | --- | .409*  (.041) | -.071  (.047) | .406*  (.038) | .381*  (.040) |
| PoC  Solidarity  (reverse) | --- | --- | .042  (.039) | .217*  (.040) | .010  (.037) | -.047  (.038) |

Asian Americans

*Note*: OLS coefficients with standard errors in parentheses. **p*<.05, ^*p*<.10, two-tailed.

|  | PoC  Solidarity | PoC Solidarity (reverse) | Support  Pathway | Oppose border patrol (reverse) | Support high-skill immigration | Support visas for legal immigrants |
| --- | --- | --- | --- | --- | --- | --- |
| Latinos:  *perpetual*  *foreigners* | .039^  (.021) | .048^  (.025) |  |  |  |  |
| PoC  Solidarity | --- | --- | .277*  (.051) | .016  (.048) | .302*  (.040) | .309*  (.041) |
| PoC  Solidarity  (reverse) | --- | --- | .166*  (.043) | .250*  (.038) | .004  (.034) | .044  (.036) |

**SI.5. Sensitivity Analysis of Downstream Path in Mediation Analysis**

***Latino sample***

Like many mediation designs, ours measure the mediator, rather than manipulate it (Baron and Kenny 1986). This means that, unlike the connection between our treatment and mediator, the path from our mediator to our outcomes is open to possible confounding. Based on recommendations from methodologists (Imai and Yamamoto 2013; Zhao et al. 2010), we conduct a sensitivity analysis of this downstream path. The goal of this test is to estimate the degree of correlation (ρ, rho) between our mediator and an unmodeled confounder that is needed for the estimated relationship between solidarity and people of color and each outcome to be compromised.

Figures SI.5.1 and SI.5.2 below report the results of our sensitivity analyses for our two outcomes in our Latino sample: support for flexible policy toward undocumented immigration and support for flexible policy toward high-skill immigration, respectively. These figures reveal that ρ would have to be ≥ .26 for each outcome so that the downstream relationship we uncovered vanishes. This presents a moderate degree of robustness, net of political ideology.

**Figure SI.5.1. Estimated Rho (ρ) Between Latino Solidarity w/PoC and Unmodeled Confounder, When Outcome is Policy Toward Undocumented Immigration**

**Figure SI.5.2. Estimated Rho (ρ) Latino Between Solidarity w/PoC and Unmodeled Confounder, When Outcome is Policy Toward High-Skill Immigration**

***Asian American sample***

We now turn to a similar analysis for our sample of Asian American adults. Figures SI.5.3 and SI.5.4 below report the results of our sensitivity analyses for our two outcomes, support for flexibly policy toward undocumented immigration and support for flexible policy toward high-skill immigration, respectively. These figures reveal that ρ would have to be greater than .21 (outcome: high-skill immigration) and .17 (outcome: undocumented immigration) for these downstream paths to vanish to zero. This presents a moderate degree of robustness, which is also net of political ideology.

**Figure SI5.3. Estimated Rho (ρ) Between Asian Solidarity w/ PoC and Unmodeled Confounder, When Outcome is Policy Toward Undocumented Immigration**

**Figure SI.5.4. Estimated Rho (ρ) Between Asian Solidarity w/ PoC and Unmodeled Confounder, When Outcome is Policy Toward High-Skill Immigration**
